# Supplementary material
Source: HighWire-hosted journal article supplement (https://cmajopen.ca/highwire/filestream/89731/field_highwire_adjunct_files/0/open-2022-0197-1-at.pdf)
Supplement: open-2022-0197-1-at.pdf [file open-2022-0197-1-at.pdf]

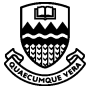

---

**INTERVIEW GUIDE**

**Study Title: COVID-19 Online Disinformation among Black Canadians**

1) How would you describe people's perception of Covid-19 in your Black community?

*Probes:*

- How do they feel about the Covid-19 situation in Canada? (e.g., fear, anxiety, stress, etc.)
- What are they doing to protect themselves and their families from Covid-19 infections?

2) To your knowledge, what misconceptions exist about Covid-19 in your Black community?

*Probes:*

- What do your community members perceive to be the origins, causes, and effects of Covid-19?
- Why do these misconceptions or conspiracies exist in the community?
- Who is responsible for such misconceptions? What is their motivation for such disinformation?

3) Where do your community members get information about Covid-19?

*Probes:*

- To what extent have online sources (e.g., social media) influenced their perception of Covid-19?
- To what extent have health workers influenced their perception of Covid-19?
- Who else is influencing their perception of Covid-19?

4) In your Black community, how has online information sources (e.g., social media) contributed to trust or mistrust for Covid-19 information/guidelines provided by governments and health workers?

5) How do the community members' perceptions of Covid-19 influence how they react or respond to the disease?

*Probes:*

- How serious do they take the disease?
- Do they follow recommended practices and guidelines for transmission prevention?
- Do their perceptions influence their attitude towards the Covid-19 vaccines?

6) How is your community's reaction similar or different from the reaction of other ethnic communities in Canada?

*Probe*

- What accounts for this difference?

7) To what extent do current Covid-19 communication strategies address the information needs of your Black community in Canada?

*Probes:*

- What do you consider as the Covid-19 information gaps in the community?
- What can provincial governments and health workers do to address these information gaps?
- What can community leaders and civil society do to address these gaps?



- 8) What is currently being done, within the Black community, to address COVID 19 online disinformation?
  - How effective/practical are these activities?
- 9) How can Black organizations/communities help to address COVID-19-related disinformation and other related online risks?
- 10) What can health practitioners and service providers do to address COVID 19 related disinformation and other related online risks within the Black community?
- 11) What can policy makers (provincial and federal members of parliament, municipal government) do to address COVID 19 related disinformation and other related online harms and threats within the Black community?
- 12) What other comments do you have that we have not discussed?

Thank you so much for your time and information.
